# Supplementary material
Source: PubMed Central journal article supplement (PMC5710437)

## Supplementary Online Content

Kubota Y, Heiss G, MacLehose RF, Roetker NS, Folsom AR. Association of educational attainment with lifetime risk of cardiovascular disease: the Atherosclerosis Risk in Communities study. *JAMA Intern Med*. Published online June 12, 2017. doi:10.1001/jamainternmed.2017.1877

### eMethods

### eReferences

**eTable.** Unadjusted and Adjusted Risk (%) of Cardiovascular Disease (95% Confidence Interval) to Various Ages According to Educational Attainment at Age 45 among all participants

**eFigure 1.** Race-specific risk estimates of cardiovascular disease from age 45 to 85 years, non-high school vs. high school graduates (1987–2013)

**eFigure 2.** Risk estimates of cardiovascular disease from age 45 to 85 years, non-high school vs. high school graduates (1987–2013)

**eFigure 3.** Risk estimates of cardiovascular disease from age 55 to 85 years according to (A) occupations and (B) parental educational attainment (1996–2013)

**eFigure 4.** Risk estimates of cardiovascular disease from age 55 to 85 years in estimated jointly by educational attainment (non-high school vs. high school graduates) and (A) occupations (precision, service or machine operating job vs. homemaking or technical and sales or professional and managerial job) or (B) parental educational attainment (non-high school vs. high school graduates) (1996–2013)

**eFigure 5.** Risk estimates of cardiovascular disease from age 55 to 85 years according to (A) income at visit 4, and (B) jointly by educational attainment (non-high school vs. high school graduates) and family income (<\$35,000 vs. ≥\$35,000), (1987–2013)

**eFigure 6.** Risk estimates of cardiovascular disease according to educational attainment for participants born (A) before and (B) after 1935

This supplementary material has been provided by the authors to give readers additional information about their work.

## **eMETHODS**

### **Study Design, Setting, and Population**

The Atherosclerosis Risk in Communities (ARIC) Study is an ongoing population-based prospective study of cardiovascular diseases (1). In 1987–1989, the ARIC Study recruited and examined 15,792 mostly Caucasian or African American men and women aged 45–64 from 4 U.S. communities [Washington County, Maryland; Forsyth County, North Carolina; Jackson, Mississippi; and suburbs of Minneapolis, Minnesota]. The participants were re-examined in 1990–1992 (visit 2, 93% return), in 1993–1995 (visit 3, 86% return), and 1996–1998 (visit 4, 80% return). The institutional review boards of the collaborating institutions approved the study protocol, and each participant provided written informed consent.

### **Risk Factor Measurements**

The main exposure of interest was self-reported educational attainment, ascertained at ARIC baseline, and categorized into six levels: (i) grade school, (ii) high school without graduation, (iii) high school with graduation, (iv) vocational school, (v) college with or without graduation, and (vi) graduate or professional school.

We assessed other potential CVD risk factors as follows: socioeconomic status; gender, race (white or African American), family income (under \$5,000, \$5,000–7,999, \$8,000–11,999, \$12,000–15,999, \$16,000–23,999, \$24,000–34,999, \$35,000–49,999, or over \$50,000), occupation for the longest time period [“precision jobs” (mechanic, repairman, construction worker or craftsman), “service jobs” (hairstylist, domestic, restaurant, or security), “machine operating jobs” (driver, machine operator, sanitation, laborer), “technical and sales jobs” (technician, sales or clerical), “professional and managerial jobs” and “homemaker”], parental educational attainment (the same levels as above), marital status and

health insurance (yes or no): lifestyle factors; smoking status (current, former, or never), alcohol drinking status (current, former, or never), alcohol amount (g/week), physical activity, and healthy diet score (2, 3): health conditions; obesity [body mass index  $\geq 30$  kg/(m)<sup>2</sup>], hypertension (systolic blood pressure  $\geq 140$  mmHg, diastolic blood pressure  $\geq 90$  mmHg or hypertension medication use), diabetes mellitus (a fasting blood glucose  $\geq 126$  mg/dl, non-fasting blood glucose  $\geq 200$  mg/dl, a self-reported physician diagnosis of diabetes, or use of antidiabetic medication in the past 2 weeks) (4), and hypercholesterolemia (total cholesterol  $\geq 240$  mg/dl or hypercholesterolemia medication use): subclinical organ damages (5); subclinical atherosclerosis defined by carotid intima media thickness  $> 0.9$  mm or the presence of plaque, electrocardiographic left ventricular hypertrophy, and chronic kidney disease defined by estimated glomerular filtration rate  $< 60$  ml/min/1.73m<sup>2</sup>. The Baecke questionnaire asked participants to report the frequency and the number of hours of participation in walking and in as many as 4 sports in the previous year (6) As in prior ARIC studies (7, 8), each sport activity was converted into metabolic equivalents of task (METs) via the Compendium of Physical Activities (9). The reliability and validity of the Baecke questionnaire were evaluated in several populations and summarized elsewhere (1, 10–12). Those who did not engage in moderate (3-6 METs) or vigorous ( $> 6$  METs) activities were defined as physically inactive. Diet was assessed by a 66-item Harvard food frequency questionnaire (2), and a healthy diet score was calculated by adding each point (0 or 1) of the following 5 healthy dietary metrics (3):  $\geq 4.5$  cups/day of fruits and vegetables (approximated as  $\geq 4.5$  servings/day in the ARIC study); 2 or more  $\geq 3.5$ -oz servings/week of fish (approximated as 3- to 5-oz servings/week); 3 or more 1-oz servings/day of whole grains (approximated as  $\geq 3$  servings/day); sodium ( $< 1,500$  mg/day); and  $\leq 36$  oz/week of sugar-sweetened beverages (approximated as  $\leq 4$  glasses/week). A diet score  $\leq 1$  was defined

as an unhealthy diet. Information on occupation and parental educational attainment was not available at ARIC baseline but was obtained at visit 4.

### **Confirmation of Cardiovascular Disease**

We defined incident CVD events as coronary heart disease, heart failure, and stroke. ARIC staff contacted participants annually by telephone to capture all hospitalizations and deaths related to possible CVD (13). They also surveyed lists of discharges from local hospitals and death certificates from state vital statistics offices for potential CVD events. Abstractors reviewed medical records and recorded information to validate CVD outcomes. Incident coronary heart disease was validated by physician review, and was defined as a definite or probable myocardial infarction, definite coronary death, or coronary revascularization procedure. Incident heart failure was defined as the first occurrence of either a hospitalization that included an International Classification of Diseases-9th Revision (ICD-9) discharge code of 428 (428.0 to 428.9) among the primary or secondary diagnoses or else a death certificate with an ICD-9 code of 428 or an ICD-10 code of I50 among the listed or underlying causes of death (14). ARIC has shown the validity of ICD-9 Code 428 to be moderately high, with a sensitivity of 93% for identifying acute decompensated heart failure (15). For patients hospitalized for potential strokes, the abstractors recorded signs and symptoms and photocopied neuroimaging (computed tomography or magnetic resonance imaging) and other diagnostic reports. Using criteria adopted from the National Survey of Stroke, definite or probable strokes were classified by computer algorithm and separate review by a physician, with disagreements resolved by a second physician (16).

### **Statistical Analysis**

SAS version 9.3 software (SAS Institute Inc., Cary, NC) was used for statistical analyses.

We excluded participants who self-reported pre-baseline CVD (coronary heart disease, heart failure or stroke) or had electrocardiographic evidence of pre-baseline coronary heart disease (n=1,553) and participants whose data on educational attainment or outcome status were missing (n=291). After exclusions, 13,948 participants were available for these analyses.

Participants were followed from age at baseline to age at CVD event, age at last follow-up contact or December 31, 2013, whichever came first. We included the first-ever coronary heart disease, heart failure or stroke event as the incident CVD event. We estimated remaining lifetime risks of incident CVD at age 45 years through age 85 years according to educational attainment, using a modified version of survival analysis (17). This method uses survival age as the time scale, combines information on participants entering the observation periods at different ages, and accounts for varying durations of follow-up by individuals (18). In addition, it adjusts for the occurrence of competing risks of non-CVD deaths to yield an accurate estimate of cumulative incidences. In contrast, standard Kaplan-Meier cumulative incidence estimation does not properly account for competing risks, often resulting in overestimates of the remaining lifetime risk (18–21). Results unadjusted and adjusted for competing risks in relation to educational attainment and lifetime risk of CVD are shown in the eTable. We also estimated the lifetime risk of CVD according to family income, occupation and parental educational attainment—other important socioeconomic factors often closely related to participants’ educational attainment—and evaluated the associations of these variables and individual educational attainment jointly with the lifetime CVD risk. After identical exclusions as above, 13,128 participants (94%) had baseline income data. Similarly, 9,381, 9,609 and 8,963 participants who were free of CVD at that time completed the visit 4 questionnaire on income, occupation and parental education, respectively, among whom we estimated lifetime risk of CVD from age 55 years to age 85 years.

In sensitivity analyses, we also evaluated the association between educational attainment and lifetime risk of CVD by stratifying on CVD risk factors [family income (<\$35,000 vs. ≥\$35,000), occupation (occupations with the top 3 highest vs. top 3 lowest lifetime risks of CVD), parental educational attainment (non-high school graduates vs. high school graduates), marital status, smoking status (current vs. former vs. never), drinking status (current vs. former vs. never), physical inactivity, diet (healthy diet score≤1 vs. healthy diet score≥2), obesity, hypertension, diabetes, and hypercholesterolemia. Next, we estimated lifetime risks of CVD according to family income at visit 4 instead of visit 1. Finally, we also evaluated the association between educational attainment and lifetime risks of CVD by stratifying birth years [individuals born before 1935 (55–64 years at baseline) vs. after 1935 (45–54 years)] to assess birth cohort effects.

## **eReferences**

1. The Atherosclerosis Risk in Communities (ARIC) Study: design and objectives. The ARIC Investigators. *Am J Epidemiol.* 1989;129(4):687–702.
2. Rimm EB, Giovannucci EL, Stampfer MJ, Colditz GA, Litin LB, Willett WC. Reproducibility and validity of an expanded self-administered semiquantitative food frequency questionnaire among male health professionals. *Am J Epidemiol.* 1992;135(10):1114–26; discussion 1127–1136.
3. Folsom AR, Yatsuya H, Nettleton JA, Lutsey PL, Cushman M, Rosamond WD; ARIC Study Investigators. Community prevalence of ideal cardiovascular health, by the American Heart Association definition, and relationship with cardiovascular disease incidence. *J Am Coll Cardiol.* 2011;57(16):1690–1696.

4. Kubota Y, London SJ, Cushman M, et al. Lung function, respiratory symptoms and venous thromboembolism risk: the Atherosclerosis Risk in Communities Study. *J Thromb Haemost.* 2016;14(12):2394–2401.
5. Mancia G, Fagard R, Narkiewicz K, et al. 2013 ESH/ESC guidelines for the management of arterial hypertension: the Task Force for the Management of Arterial Hypertension of the European Society of Hypertension (ESH) and of the European Society of Cardiology (ESC). *Eur Heart J.* 2013;34(28):2159–2219.
6. Baecke JA, Burema J, Frijters JE. A short questionnaire for the measurement of habitual physical activity in epidemiological studies. *Am J Clin Nutr.* 1982;36(5):936–942.
7. Bell EJ, Lutsey PL, Windham BG, Folsom AR. Physical activity and cardiovascular disease in African Americans in Atherosclerosis Risk in Communities. *Med Sci Sports Exerc.* 2013;45(5):901–907.
8. Shah AM, Claggett B, Folsom AR, et al. Ideal Cardiovascular Health During Adult Life and Cardiovascular Structure and Function Among the Elderly. *Circulation.* 2015;132(21):1979–1989.
9. Ainsworth BE, Haskell WL, Whitt MC, et al. Compendium of physical activities: an update of activity codes and MET intensities. *Med Sci Sports Exerc.* 2000;32(9 Suppl):S498–504.
10. Jacobs DR Jr, Ainsworth BE, Hartman TJ, Leon AS. A simultaneous evaluation of 10 commonly used physical activity questionnaires. *Med Sci Sports Exerc.* 1993;25(1):81–91.
11. Pols MA, Peeters PH, Bueno-De-Mesquita HB, et al. Validity and repeatability of a modified Baecke questionnaire on physical activity. *Int J Epidemiol.* 1995; 24(2):381–388.
12. Richardson MT, Ainsworth BE, Wu HC, Jacobs DR Jr, Leon AS. Ability of the

- Atherosclerosis Risk in Communities (ARIC)/Baecke Questionnaire to assess leisure-time physical activity. *Int J Epidemiol*. 1995;24(4):685–693.
13. Folsom AR, Alonso A, Misialek JR, et al. Parathyroid hormone concentration and risk of cardiovascular diseases: the Atherosclerosis Risk in Communities (ARIC) study. *Am Heart J*. 2014;168(3):296–302.
  14. Loehr LR, Rosamond WD, Chang PP, Folsom AR, Chambless LE. Heart failure incidence and survival (from the Atherosclerosis Risk in Communities Study). *Am J Cardiol*. 2008;101(7):1016–1022.
  15. Rosamond WD, Chang PP, Baggett C, et al. Classification of heart failure in the atherosclerosis risk in communities (ARIC) study: a comparison of diagnostic criteria. *Circ Heart Fail*. 2012;5(2):152–159.
  16. The National Survey of Stroke. National Institute of Neurological and Communicative Disorders and Stroke. *Stroke*. 1981;12(2 Pt Suppl 1):I1–91.
  17. Beiser A, D’Agostino RB Sr, Seshadri S, Sullivan LM, Wolf PA. Computing estimates of incidence, including lifetime risk: Alzheimer’s disease in the Framingham Study. The Practical Incidence Estimators (PIE) macro. *Stat Med*. 2000;19(11–12):1495–1522.
  18. Vasan RS, Beiser A, Seshadri S, et al. Residual lifetime risk for developing hypertension in middle-aged women and men: The Framingham Heart Study. *JAMA*. 2002;287(8):1003–1010.
  19. Berry JD, Dyer A, Cai X, et al. Lifetime risks of cardiovascular disease. *N Engl J Med*. 2012;366(4):321–329.
  20. Wilkins JT, Ning H, Berry J, Zhao L, Dyer AR, Lloyd-Jones DM. Lifetime Risk and Years Lived Free of Total Cardiovascular Disease. *JAMA*. 2012;308(17):1795–1801.
  21. Leening MJ, Ferret BS, Steyerberg EW, et al. Sex differences in lifetime risk and first manifestation of cardiovascular disease: prospective population based cohort study. *BMJ*.



2014;349:g5992.

**eTable.** Unadjusted and Adjusted Risk (%) of Cardiovascular Disease (95% Confidence Interval) to Various Ages According to Educational Attainment at Age 45 among all participants

| CVD risk (%) to age  | Educational attainment |                                |                             |                   |                                    |                              |
|----------------------|------------------------|--------------------------------|-----------------------------|-------------------|------------------------------------|------------------------------|
|                      | Grade school           | High school without graduation | High school with graduation | Vocational school | College with or without graduation | Graduate/professional school |
| Unadjusted Model     |                        |                                |                             |                   |                                    |                              |
| 55 y                 | 10.7 (6.3–15.1)        | 5.8 (3.6–8.0)                  | 5.5 (4.1–6.9)               | 3.4 (1.5–5.3)     | 3.6 (2.6–4.7)                      | 3.3 (2.0–4.6)                |
| 65 y                 | 26.3 (21.9–30.6)       | 20.6 (18.1–23.2)               | 15.3 (13.7–16.9)            | 13.0 (10.5–15.6)  | 12.1 (10.7–13.5)                   | 10.3 (8.5–12.2)              |
| 75 y                 | 46.5 (42.6–50.3)       | 40.3 (37.6–42.9)               | 29.9 (28.2–31.6)            | 26.5 (23.5–29.5)  | 25.8 (24.1–27.4)                   | 22.1 (19.7–24.6)             |
| 85 y (lifetime risk) | 63.2 (59.6–66.8)       | 58.6 (55.3–61.8)               | 47.3 (45.1–49.6)            | 45.4 (41.2–49.6)  | 44.4 (41.8–47.0)                   | 40.3 (36.1–44.5)             |
| Adjusted model       |                        |                                |                             |                   |                                    |                              |
| 55 y                 | 10.7 (6.3–15.1)        | 5.7 (3.5–7.9)                  | 5.4 (4.0–6.9)               | 3.4 (1.5–5.3)     | 3.6 (2.6–4.7)                      | 3.3 (2.0–4.6)                |
| 65 y                 | 25.6 (21.2–30.0)       | 20.0 (17.4–22.6)               | 15.0 (13.4–16.6)            | 12.7 (10.1–15.2)  | 11.8 (10.5–13.2)                   | 10.1 (8.3–12.0)              |
| 75 y                 | 43.1 (39.3–47.0)       | 37.3 (34.6–39.9)               | 28.2 (26.5–30.0)            | 24.9 (22.0–27.8)  | 24.4 (22.7–26.0)                   | 21.1 (18.7–23.4)             |
| 85 y (lifetime risk) | 55.0 (51.4–58.6)       | 50.5 (47.3–53.3)               | 41.7 (39.5–43.8)            | 39.7 (35.5–43.4)  | 39.2 (36.6–41.4)                   | 36.1 (31.9–39.7)             |

**eFigure 1.** Race-specific risk estimates of cardiovascular disease from age 45 to 85 years, non-high school vs. high school graduates (1987–2013)

**A**

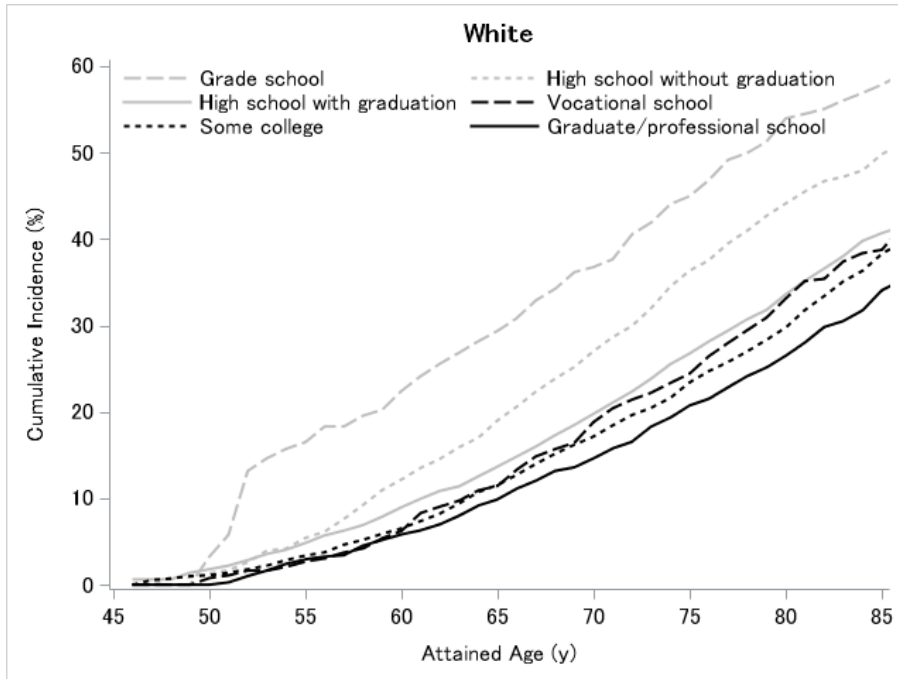

**B**

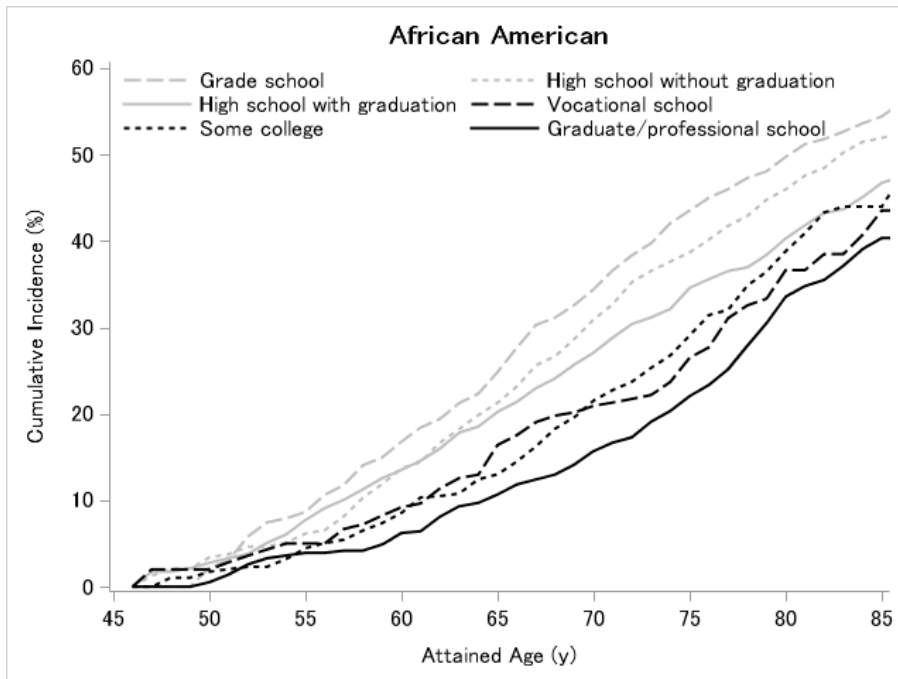

**eFigure 2.** Risk estimates of cardiovascular disease from age 45 to 85 years, non-high school vs. high school graduates (1987–2013)

**A**

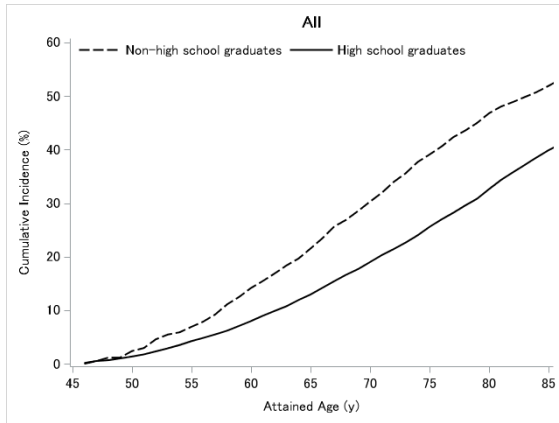

**B**

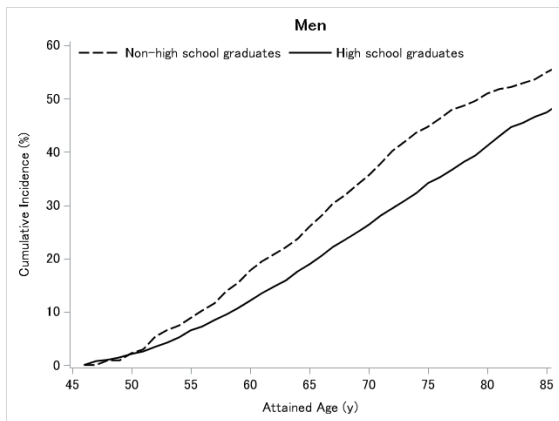

**C**

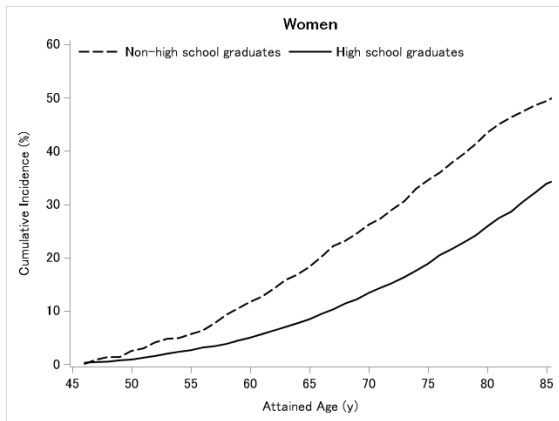

**eFigure 3.** Risk estimates of cardiovascular disease from age 55 to 85 years according to (A) occupations and (B) parental educational attainment (1996–2013)

**A**

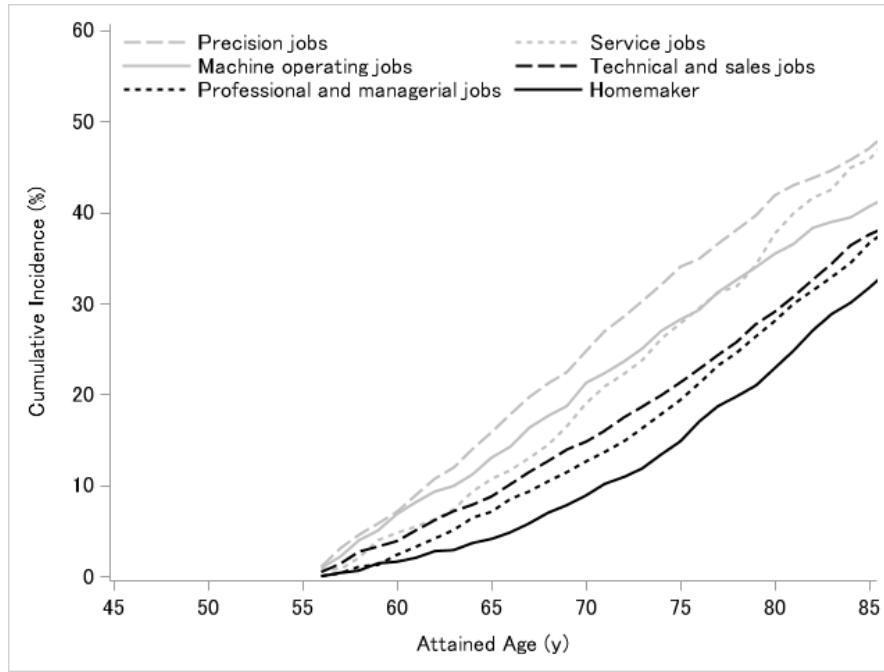

**B**

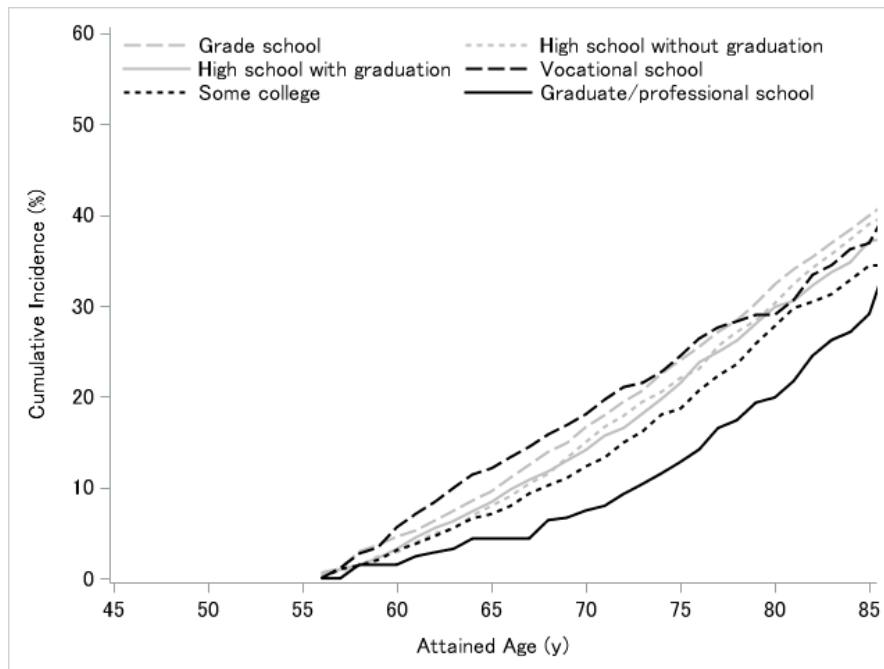

**eFigure 4.** Risk estimates of cardiovascular disease from age 55 to 85 years in estimated jointly by educational attainment (non-high school vs. high school graduates) and (A) occupations (precision, service or machine operating job vs. homemaking or technical and sales or professional and managerial job) or (B) parental educational attainment (non-high school vs. high school graduates) (1996–2013)

**A**

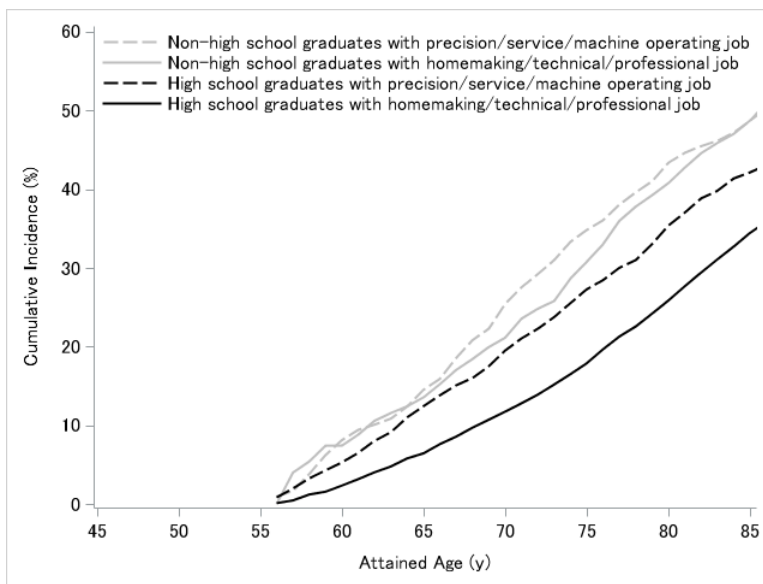

**B**

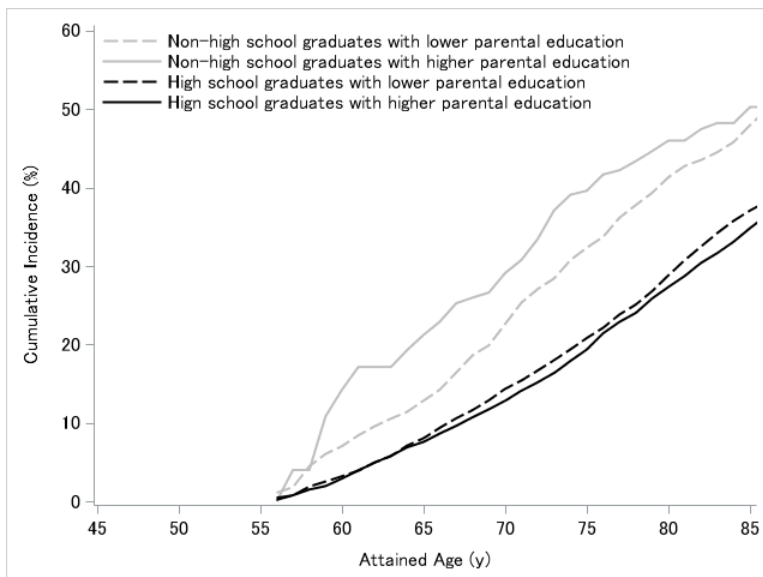

**eFigure 5.** Risk estimates of cardiovascular disease from age 55 to 85 years according to (A) income at visit 4, and (B) jointly by educational attainment (non-high school vs. high school graduates) and family income (<\$35,000 vs. ≥\$35,000), (1987–2013)

**A**

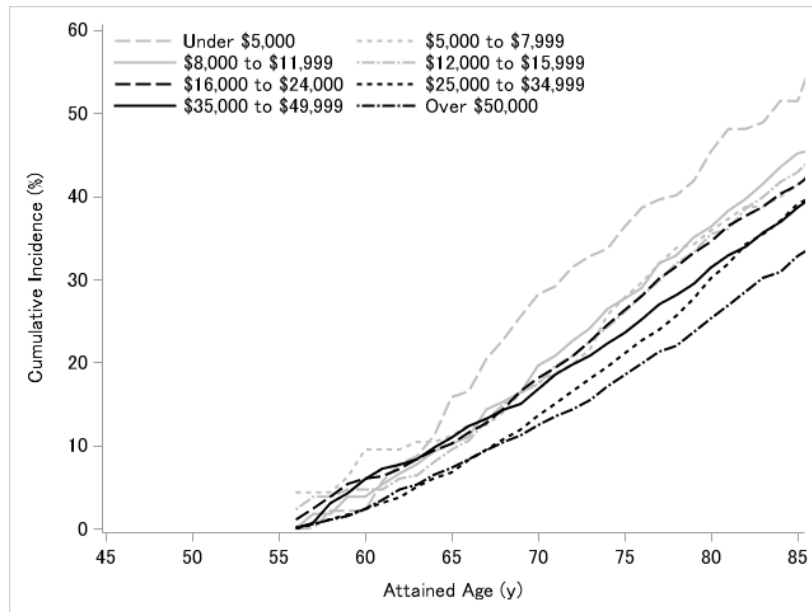

**B**

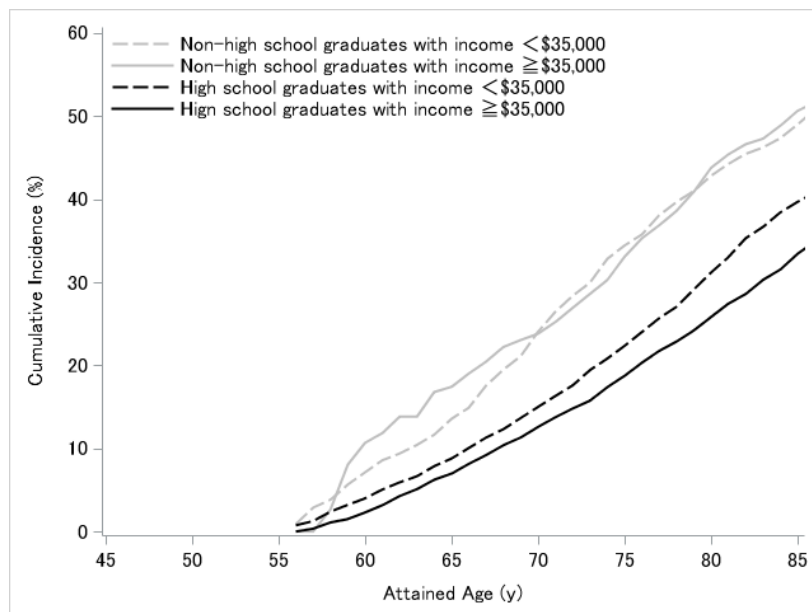

**eFigure 6.** Risk estimates of cardiovascular disease according to educational attainment for participants born (A) before and (B) after 1935

**A**

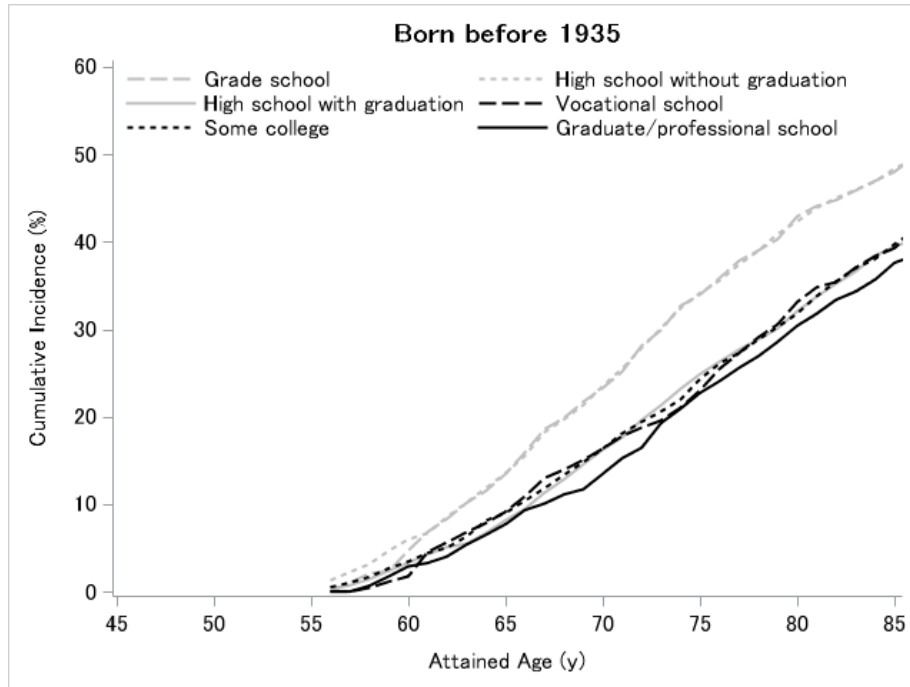

**B**

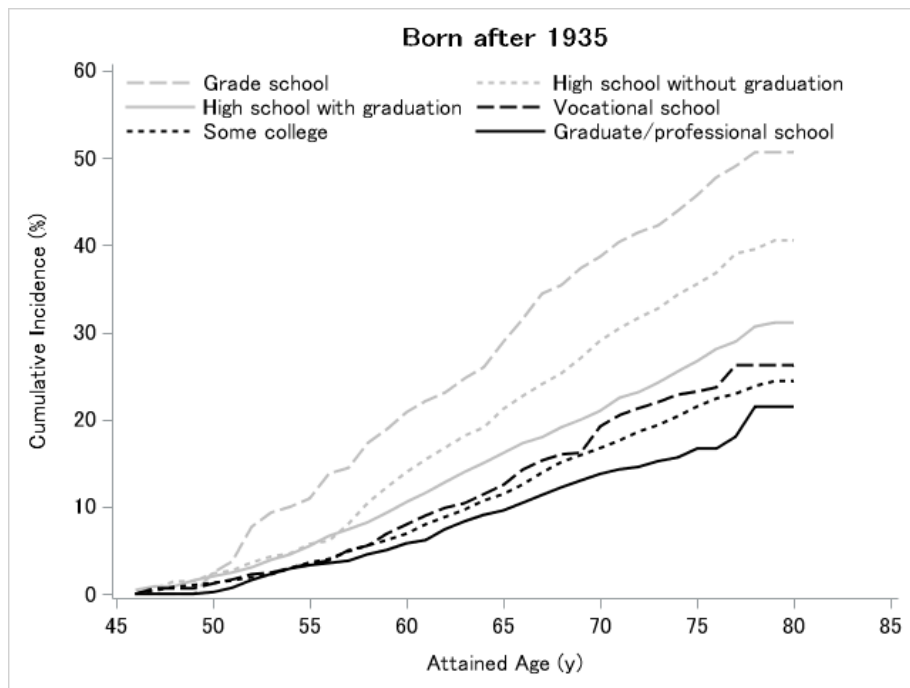

Supplement: jamainternmed-177-1165-s001.pdf [file jamainternmed-177-1165-s001.pdf]
